# Supplementary material
Source: ML conference proceedings conference paper supplement (https://openaccess.thecvf.com/content/CVPR2022/html/Otani_Optimal_Correction_Cost_CVPR_2022_paper.html)
Supplement: Supplementary file 1 [file Otani_Optimal_Correction_Cost_CVPR_2022_supplemental.zip]

Archive with 56 entries (46 files):
- codes/
- __MACOSX/._codes
- codes/demo/
- __MACOSX/codes/._demo
- codes/.DS_Store
- __MACOSX/codes/._.DS_Store
- codes/requirements.txt
- __MACOSX/codes/._requirements.txt
- codes/README.md
- __MACOSX/codes/._README.md
- codes/data/
- __MACOSX/codes/._data
- codes/src/
- __MACOSX/codes/._src
- codes/demo/interactive_oc_demo.ipynb
- __MACOSX/codes/demo/._interactive_oc_demo.ipynb
- codes/demo/.ipynb_checkpoints/
- __MACOSX/codes/demo/._.ipynb_checkpoints
- codes/src/tools/
- __MACOSX/codes/src/._tools
- codes/src/.DS_Store
- __MACOSX/codes/src/._.DS_Store
- codes/src/__init__.py
- __MACOSX/codes/src/.___init__.py
- codes/src/utils/
- __MACOSX/codes/src/._utils
- codes/src/extensions/
- __MACOSX/codes/src/._extensions
- codes/src/tools/run_evaluation.py
- __MACOSX/codes/src/tools/._run_evaluation.py
- codes/src/utils/model_cfg.py
- __MACOSX/codes/src/utils/._model_cfg.py
- codes/src/utils/.DS_Store
- __MACOSX/codes/src/utils/._.DS_Store
- codes/src/utils/neptune_utils.py
- __MACOSX/codes/src/utils/._neptune_utils.py
- codes/src/extensions/metrics/
- __MACOSX/codes/src/extensions/._metrics
- codes/src/extensions/.DS_Store
- __MACOSX/codes/src/extensions/._.DS_Store
- codes/src/extensions/dataset/
- __MACOSX/codes/src/extensions/._dataset
- codes/src/extensions/__init__.py
- __MACOSX/codes/src/extensions/.___init__.py
- codes/src/extensions/metrics/.DS_Store
- __MACOSX/codes/src/extensions/metrics/._.DS_Store
- codes/src/extensions/metrics/ot_cost.py
- __MACOSX/codes/src/extensions/metrics/._ot_cost.py
- codes/src/extensions/dataset/.DS_Store
- __MACOSX/codes/src/extensions/dataset/._.DS_Store
- codes/src/extensions/dataset/coco_custom.py
- __MACOSX/codes/src/extensions/dataset/._coco_custom.py
- codes/src/extensions/dataset/coco_otc.py
- __MACOSX/codes/src/extensions/dataset/._coco_otc.py
- supplementary.pdf
- __MACOSX/._supplementary.pdf
