# Supplementary material
Source: ML conference proceedings conference paper supplement (https://openaccess.thecvf.com/content/CVPR2022/html/Otani_Optimal_Correction_Cost_CVPR_2022_paper.html)
Supplement: Supplementary file 1 [file Otani_Optimal_Correction_Cost_CVPR_2022_supplemental.zip › codes/requirements.txt]

POT = 0.7.0
jupyter-bbox-widget = 0.3.2
seaborn
jupyterlab
imageio
