# Supplementary material
Source: ML conference proceedings conference paper supplement (https://openaccess.thecvf.com/content/CVPR2022/html/Otani_Optimal_Correction_Cost_CVPR_2022_paper.html)
Supplement: Supplementary file 1 [file Otani_Optimal_Correction_Cost_CVPR_2022_supplemental.zip › codes/src/utils/model_cfg.py]

MODEL_CFGS = {
    "retinanet_r50_fpn_2x_coco": "RetinaNet",
    "faster_rcnn_r50_fpn_2x_coco": "Faster-RCNN",
    "yolof_r50_c5_8x8_1x_coco": "YOLOF",
    "detr_r50_8x2_150e_coco": "DETR",
    "vfnet_r50_fpn_mstrain_2x_coco": "VFNet",
}

HPARAMS = {
    "retinanet_r50_fpn_2x_coco": (0.43598890332534085, 0.412228367164052),
    "faster_rcnn_r50_fpn_2x_coco": (0.5003324691372958, 0.4153849157228604),
    "yolof_r50_c5_8x8_1x_coco": (0.37816616801077146, 0.5319397012193535),
    "vfnet_r50_fpn_mstrain_2x_coco": (0.5336419540698258, 0.6188961302543405), 
}
